# Supplementary material for: A time-course transcriptome analysis of Escherichia coli with direct electrochemistry behavior in microbial fuel cells
Source: Royal Society of Chemistry journal article supplement (doi:10.1039/b912003c), 2009-01-01
Supplement: b912003c.pdf [file b912003c.pdf]

# A Time-Course Transcriptome Analysis of *Escherichia coli* with Direct Electrocatalytic Behavior in Microbial Fuel Cells

Yan Qiao,<sup>a,b</sup> Chang Ming Li,<sup>\*a,b</sup> Zhisong Lu,<sup>a,b</sup> Hua Ling,<sup>a</sup> Aram Kang,<sup>a</sup> and Matthew Wook Chang<sup>\*a</sup>

## Methods

### MFC set up and electrochemical measurement

A dual chamber MFC was used in this work. The capacity of each chamber is 120 mL and a nafion 117 membrane with diameter of 15 mm was clamped between the two chambers. Both of the anode and cathode are carbon cloth (2cm×2cm). The catholyte is K<sub>3</sub>[Fe(CN)<sub>6</sub>] and anolyte is the cell culture containing glucose. For the current generation measurement, an external load of 2 kΩ was connected into the MFC and the Current and potential measurements on the MFC were carried out by using a benchtop digital multimeter (ESCORT 3146A) during discharge. For the cyclic voltammetry measurement, the reference electrode (saturated calomel electrode, SCE) was inserted into anodic chamber and the cyclic voltammograms were measured by Autolab PGSTAT30 electrochemical working station. The electrochemical impedance spectra were measured at open circuit potential in a frequency range of 100 kHz to 1 mHz with an ac signal of 10 mV amplitude.

### Bacterial strains and growth conditions

*E. coli* K12 overnight cultures were grown from freezer stocks in 100 ml aliquots (500 ml shaker flasks) of Luria–Bertani (LB) broth (10 g of tryptone, 5 g of yeast extract, and 10 g of sodium chloride per liter) at 37°C, with shaking at 250 rpm for 16 h. The overnight cultures were diluted 1:100 in 100 ml prewarmed LB broth and incubated at 37°C, with shaking at 200 rpm until the optical density at 600 nm (OD600) reached early logarithmic phase (OD600~0.5). Then the cell suspension were transferred into the anodic chamber of the MFC and purged nitrogen for 30 min. Before current generation test, glucose was added into anodic chamber to final concentration of 55 mM. the cell growth was monitored by measuring OD600 with a Lambda 25 spectrophotometer (Perkin Elmer).

### RNA isolation

*E. coli* cells were harvested by centrifugation (>8,000×g) at different time points, and then incubated in TE buffer with 1 mg/ml of lysozyme (Sigmaaldrich). RNA was isolated immediately using RNeasy Mini Kit (Qiagen) according to the manufacturer's protocol. Finally, samples were eluted with 50 µl of nuclease-free water (Ambion). RNA quality, purity, and integrity were determined using both a NanoDrop<sup>TM</sup> 1000 Spectrophotometer (Thermo Scientific) and an RNA 6000 Nano LabChips with an Agilent 2100 Bioanalyzer (Agilent Technologies).

### cDNA synthesis and labeling

cDNA was synthesized, purified and labeled from 10 µg of RNA with FairPlay® III Microarray Labeling Kit (Stratagene) according to the protocol provided by the manufacturer. The fluorescent dye-labeled cDNA is purified using the DNA-binding solution and microspin cups provided in the kit.

### Hybridization and scanning

Microarray hybridizations were carried out on Agilent *E. coli* oligo microarrays using 300ng Cy<sub>3</sub>-labeled 'reference' sample and 300ng Cy<sub>5</sub>-labeled 'experimental' sample. Hybridizations were carried out using the Agilent hybridization kit and a hybridization oven (Agilent) and then the microarray slides were washed with Gene

Expression Wash Buffer 1 & 2 (Agilent) containing 0.005% Triton X-102. The slides were scanned by Agilent G2565BA Microarray Scanner.

#### Data analysis

Data analysis was performed with the Feature Expression Software (Agilent Technologies) v. 10.5 and GeneSpring GX v. 10 (Agilent Technologies). Genes that received “present” and “marginal” calls from 50% or more of the replicates in all conditions were used for the analysis. Finally, gene expression changes with statistical significance were identified by an upper one-tailed t test (p cutoff value, 0.05). “Fold change” was calculated as the ratio between the signal averages of four untreated and four treated cultures. That is, results are from biological quadruplicate experiments. Genes with a twofold or more induction or repression in at least one condition were used in this analysis.

**Supplementary Table S1**

|                      | 0-hour | 6-hour | 12-hour | 24-hour |      |
|----------------------|--------|--------|---------|---------|------|
| $E_{pa}$ (mV)        | -      | -      | 257     | -2      | -268 |
| $E_{pa}/2$ (mV)      | -      | -      | 194     | -36     | -297 |
| $E_{pc}$ (mV)        | -      | 123    | 118     | -65     | -317 |
| $\Delta E_p$ (mV)    | -      | -      | 139     | 63      | 49   |
| $i_{pa}$ ( $\mu A$ ) | -      | -      | -90.15  | -153.9  | -120 |
| $i_{pc}$ ( $\mu A$ ) | -      | 68.6   | 201     | 91.91   | 354  |

**Supplementary Figure S1** Simulated Nyquist Plots and equivalent circuit used for calculation

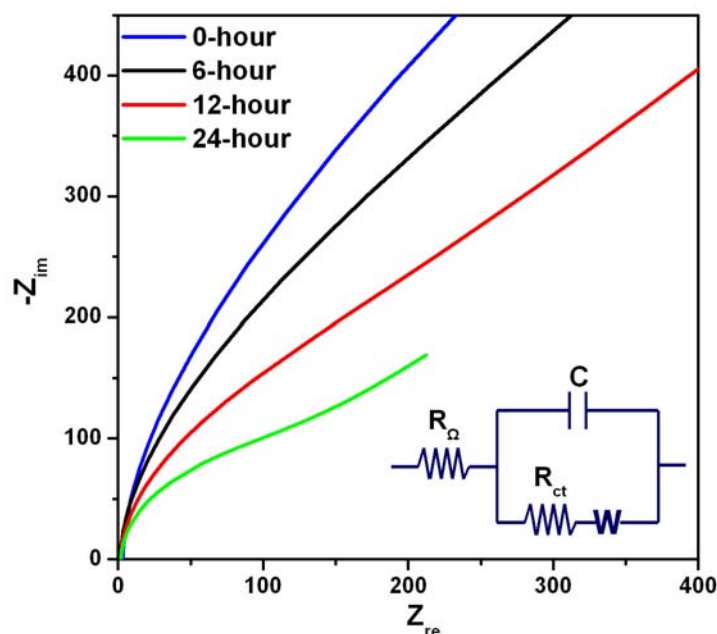

The parameters included in the equivalent circuit are ohmic resistance of electrolyte ( $R_{\Omega}$ ), capacitance of the electrode ( $C$ ), charge transfer resistance ( $R_{ct}$ ) and Warburg impedance ( $W$ ).

**Supplementary Table S2** Calculated impedance values from the equivalent circuit

|          | 0-hour       | 6-hour       | 12-hour        | 24-hour        |
|----------|--------------|--------------|----------------|----------------|
| $R_{ct}$ | 285 $\Omega$ | 207 $\Omega$ | 150.5 $\Omega$ | 107.5 $\Omega$ |

**Supplementary Figure S2** SEM micrographs of *E. coli* cells surface morphology. a: Control cells at 24-hr; b: MFC cells at 24-hr.

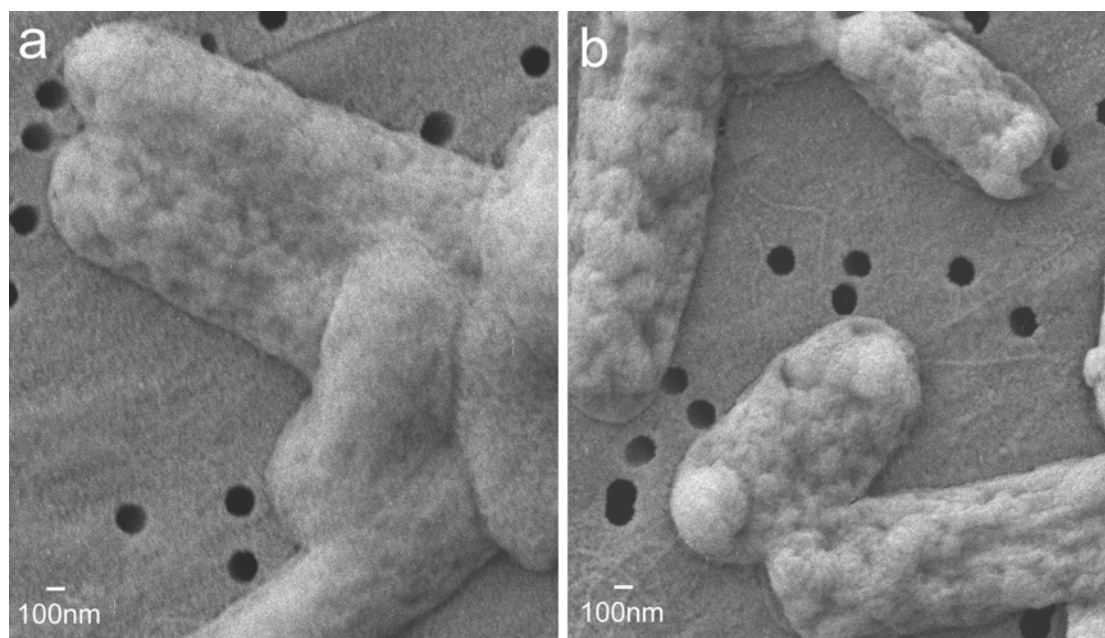

**Supplementary Figure S3** Cluster profiles shown as average  $\log_2$ Ratio with standard deviation.

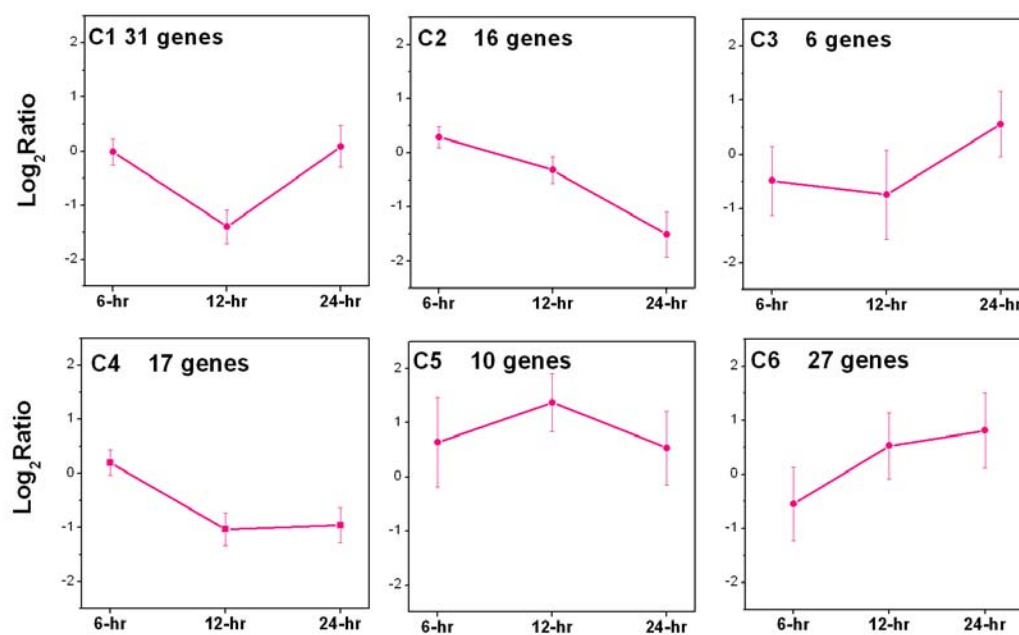

**Supplementary Table S3** *E. coli* K12 genes that showed statistically significant mRNA level changes upon one of the three time points during discharge in MFC

| b         | Gene | Description                                                                               | Functional class      | Fold Change |       |       |
|-----------|------|-------------------------------------------------------------------------------------------|-----------------------|-------------|-------|-------|
| number    | Name |                                                                                           |                       | 6-hr        | 12-hr | 24-hr |
| Cluster 1 |      |                                                                                           |                       |             |       |       |
| b0660     | ybeZ | putative ATP-binding protein in pho regulon                                               | Cellular processes    | -1.30       | -2.01 | -1.13 |
| b2669     | stpA | DNA-binding protein; H-NS-like protein;<br>chaperone activity; RNA splicing?              | DNA metabolism        | 1.16        | -2.30 | -1.02 |
| b3635     | mutM | formamidopyrimidine DNA glycosylase                                                       | DNA metabolism        | 1.27        | -2.98 | 1.59  |
| b0629     | ybeF | putative transcriptional regulator LYSR-type                                              | Energy metabolism     | 1.04        | -2.27 | -1.20 |
| b0492     | ybbN | putative thioredoxin-like protein                                                         | Hypothetical proteins | 1.04        | -2.59 | 1.43  |
| b0631     | ybeD | orf, hypothetical protein                                                                 | Hypothetical proteins | 1.05        | -3.52 | 1.19  |
| b0659     | ybeY | orf, hypothetical protein                                                                 | Hypothetical proteins | -1.11       | -2.03 | -1.03 |
| b1321     | ycjX | putative EC 2.1 enzymes                                                                   | Hypothetical proteins | -1.14       | -2.49 | 1.23  |
| b1322     | ycjF | orf, hypothetical protein                                                                 | Hypothetical proteins | 1.06        | -2.38 | 1.34  |
| b1521     | uxaB | altronate oxidoreductase                                                                  | Hypothetical proteins | -1.01       | -3.72 | -2.17 |
| b2726     | hypA | pleiotrophic effects on 3 hydrogenase isozymes                                            | Hypothetical proteins | 1.24        | -2.74 | -1.08 |
| b2731     | fhlA | formate hydrogen-lyase transcriptional activator<br>for fdhF, hyc and hyp operons         | Hypothetical proteins | 1.09        | -2.01 | -1.49 |
| b3400     | hslR | orf, hypothetical protein                                                                 | Hypothetical proteins | -1.11       | -3.98 | 1.35  |
| b3401     | hslO | orf, hypothetical protein                                                                 | Hypothetical proteins | 1.05        | -3.79 | 1.41  |
| b4173     | hflX | GTP - binding subunit of protease specific for<br>phage lambda cII repressor              | Hypothetical proteins | 1.22        | -2.26 | -1.24 |
| b0015     | dnaJ | chaperone with DnaK; heat shock protein                                                   | Protein fate          | -1.11       | -3.00 | -1.07 |
| b0439     | lon  | DNA-binding, ATP-dependent protease La; heat<br>shock K-protein                           | Protein fate          | -1.13       | -2.63 | 1.20  |
| b0473     | hspG | chaperone Hsp90, heat shock protein C 62.5                                                | Protein fate          | -1.30       | -3.47 | 1.39  |
| b0630     | lipB | protein of lipoate biosynthesis                                                           | Protein fate          | -1.01       | -2.86 | 1.17  |
| b2592     | clpB | heat shock protein                                                                        | Protein fate          | -1.16       | -2.96 | 1.20  |
| b2614     | grpE | phage lambda replication; host DNA synthesis;<br>heat shock protein; protein repair       | Protein fate          | -1.24       | -3.67 | 1.42  |
| b3931     | hslU | heat shock protein hslVU, ATPase subunit,<br>homologous to chaperones                     | Protein fate          | -1.05       | -2.23 | 1.21  |
| b3932     | hslV | heat shock protein hslVU, proteasome-related<br>peptidase subunit                         | Protein fate          | -1.02       | -2.72 | -1.05 |
| b4143     | groL | GroEL, chaperone Hsp60, peptide-dependent<br>ATPase, heat shock protein                   | Protein fate          | -1.24       | -2.24 | 1.57  |
| b4174     | hflK | protease specific for phage lambda cII repressor                                          | Protein fate          | 1.08        | -2.56 | -1.14 |
| b4175     | hflC | protease specific for phage lambda cII repressor                                          | Protein fate          | 1.17        | -2.11 | -1.20 |
| b4142     | groS | GroES, 10 Kd chaperone binds to Hsp60 in pres.<br>Mg-ATP, suppressing its ATPase activity | Protein fate          | -1.61       | -2.49 | 1.17  |
| b4171     | miaA | delta                                                                                     | Protein synthesis     | 1.11        | -2.17 | 1.11  |

|                  |             |                                                                                               |                                                    |       |       |       |
|------------------|-------------|-----------------------------------------------------------------------------------------------|----------------------------------------------------|-------|-------|-------|
| b4237            | <i>nrdG</i> | anaerobic ribonucleotide reductase activating protein                                         | Purines, pyrimidines, nucleosides, and nucleotides | 1.11  | -2.47 | -1.45 |
| b3292            | <i>zntR</i> | putative transcriptional regulator                                                            | Regulatory functions                               | -1.02 | -2.01 | 1.19  |
| b3071            | <i>yqjI</i> | orf, hypothetical protein                                                                     | Transcription                                      | 1.03  | -2.59 | -1.70 |
| <b>Cluster 2</b> |             |                                                                                               |                                                    |       |       |       |
| b0273            | <i>argF</i> | ornithine carbamoyltransferase 2, chain F                                                     | Amino acid biosynthesis                            | 1.39  | -1.55 | -4.41 |
| b2019            | <i>hisG</i> | ATP phosphoribosyltransferase                                                                 | Amino acid biosynthesis                            | 1.22  | -1.53 | -2.71 |
| b2020            | <i>hisD</i> | L-histidinal:NAD <sup>+</sup> oxidoreductase;<br>L-histidinol:NAD <sup>+</sup> oxidoreductase | Amino acid biosynthesis                            | 1.14  | -1.53 | -3.36 |
| b2818            | <i>argA</i> | N-acetylglutamate synthase; amino acid acetyltransferase                                      | Amino acid biosynthesis                            | 1.14  | -1.15 | -2.43 |
| b3172            | <i>argG</i> | argininosuccinate synthetase                                                                  | Amino acid biosynthesis                            | 1.45  | -1.13 | -2.75 |
| b3359            | <i>argD</i> | acetylornithine delta-aminotransferase                                                        | Amino acid biosynthesis                            | 1.35  | -1.13 | -2.06 |
| b3958            | <i>argC</i> | N-acetyl-gamma-glutamylphosphate reductase                                                    | Amino acid biosynthesis                            | 1.26  | -1.34 | -3.38 |
| b3959            | <i>argB</i> | acetylglutamate kinase                                                                        | Amino acid biosynthesis                            | 1.30  | -1.39 | -3.79 |
| b3960            | <i>argH</i> | argininosuccinate lyase                                                                       | Amino acid biosynthesis                            | 1.50  | 1.03  | -2.39 |
| b4254            | <i>argI</i> | ornithine carbamoyltransferase 1                                                              | Amino acid biosynthesis;<br>Energy metabolism      | 1.23  | -1.23 | -2.96 |
| b0272            | <i>yagI</i> | putative regulator                                                                            | Regulatory functions                               | 1.38  | -1.18 | -5.30 |
| b3405            | <i>ompR</i> | response regulator                                                                            | Regulatory functions                               | 1.01  | -1.54 | -2.12 |
| b0860            | <i>artJ</i> | arginine 3rd transport system periplasmic binding protein                                     | Transport and binding proteins                     | 1.23  | -1.35 | -3.26 |
| b0862            | <i>artQ</i> | arginine 3rd transport system permease protein                                                | Transport and binding proteins                     | 1.08  | 1.10  | -2.08 |
| b2309            | <i>hisJ</i> | histidine-binding periplasmic protein of high-affinity histidine transport system             | Transport and binding proteins                     | -1.07 | -1.32 | -2.13 |
| b3957            | <i>argE</i> | acetylornithine deacetylase                                                                   | Unclassified                                       | 1.09  | 1.01  | -2.28 |
| <b>Cluster 3</b> |             |                                                                                               |                                                    |       |       |       |
| b0606            | <i>ahpF</i> | alkyl hydroperoxide reductase, F52a subunit; detoxification of hydroperoxides                 | Cellular processes                                 | -2.06 | -1.76 | 1.13  |
| b2582            | <i>trxC</i> | putative thioredoxin-like protein                                                             | Energy metabolism                                  | -2.35 | -2.97 | -1.14 |
| b0802            | <i>ybiJ</i> | orf, hypothetical protein                                                                     | Hypothetical proteins                              | -1.09 | -1.19 | 2.51  |
| b4104            | <i>phnE</i> | membrane channel protein component of Pn transporter                                          | Unclassified                                       | 1.59  | 1.12  | 2.04  |
| b4367            | <i>fhuF</i> | orf, hypothetical protein                                                                     | Unknown function                                   | -2.13 | -1.88 | 1.04  |
| b3913            |             | orf, hypothetical protein                                                                     | Unknown function                                   | 1.41  | 1.57  | 2.23  |

| Cluster 4 |             |                                                                                                     |                                                                  |       |       |       |
|-----------|-------------|-----------------------------------------------------------------------------------------------------|------------------------------------------------------------------|-------|-------|-------|
| b3767     | <i>ilvG</i> | acetolactate synthase II, large subunit, cryptic,<br>interrupted                                    | Amino acid biosynthesis                                          | 1.15  | -1.50 | -2.01 |
| b2727     | <i>hypB</i> | guanine-nucleotide binding protein, functions as<br>nickel donor for large subunit of hydrogenase 3 | Central intermediary<br>metabolism;Energy<br>metabolism          | 1.08  | -2.07 | -2.45 |
| b2724     | <i>hycB</i> | probable small subunit of hydrogenase-3,<br>iron-sulfur protein                                     | Energy metabolism                                                | 1.15  | -2.17 | -1.59 |
| b2719     | <i>hycG</i> | hydrogenase activity                                                                                | Energy metabolism                                                | 1.15  | -1.77 | -2.12 |
| b2729     | <i>hypD</i> | pleiotrophic effects on 3 hydrogenase isozymes                                                      | Energy metabolism                                                | 1.09  | -2.15 | -2.23 |
| b4079     | <i>fdhF</i> | selenopolypeptide subunit of formate<br>dehydrogenase H                                             | Energy metabolism                                                | 1.09  | -2.23 | -2.23 |
| b2997     | <i>hybO</i> | putative hydrogenase subunit                                                                        | Energy metabolism                                                | 1.04  | -2.06 | -1.78 |
| b3673     | <i>emrD</i> | 2-module integral membrane pump; multidrug<br>resistance                                            | Hypothetical proteins                                            | 2.02  | -1.23 | -1.10 |
| b4218     | <i>ytfL</i> | putative transport protein                                                                          | Hypothetical proteins                                            | 1.22  | -2.10 | -1.55 |
| b4212     | <i>ytfH</i> | orf, hypothetical protein                                                                           | Hypothetical proteins                                            | 1.14  | -2.19 | -1.96 |
| b2728     | <i>hypC</i> | pleiotrophic effects on 3 hydrogenase isozymes                                                      | Hypothetical proteins                                            | 1.02  | -2.45 | -2.41 |
| b3010     | <i>yqhC</i> | putative ARAC-type regulatory protein                                                               | Regulatory functions                                             | 1.12  | -1.68 | -2.18 |
| b4063     | <i>soxR</i> | redox-sensing activator of soxS                                                                     | Unclassified                                                     | 1.22  | -2.33 | -1.65 |
| b0674     | <i>asnB</i> | asparagine synthetase B                                                                             | Unclassified                                                     | 1.09  | -2.08 | -1.69 |
| b2730     | <i>hypE</i> | plays structural role in maturation of all 3<br>hydrogenases                                        | Unclassified                                                     | -1.08 | -1.96 | -2.06 |
| b3154     | <i>yhbP</i> | orf, hypothetical protein                                                                           | Unknown function                                                 | 1.17  | -3.20 | -2.97 |
| b3596     | <i>yibG</i> | orf, hypothetical protein                                                                           | Unknown function                                                 | 1.14  | -2.24 | -1.88 |
| Cluster 5 |             |                                                                                                     |                                                                  |       |       |       |
| b0003     | <i>thrB</i> | homoserine kinase                                                                                   | Amino acid biosynthesis                                          | 1.06  | 2.40  | -1.36 |
| b0002     | <i>thrA</i> | aspartokinase I, homoserine dehydrogenase I                                                         | Amino acid biosynthesis                                          | 1.12  | 2.32  | -1.24 |
| b0775     | <i>bioB</i> | biotin synthesis, sulfur insertion?                                                                 | Biosynthesis of cofactors,<br>prosthetic groups, and<br>carriers | 2.37  | 2.70  | 1.58  |
| b2867     | <i>xdhB</i> | putative dehydrogenase                                                                              | Energy metabolism                                                | 1.04  | 2.00  | 1.36  |
| b0734     | <i>cydB</i> | cytochrome d terminal oxidase polypeptide<br>subunit II                                             | Energy metabolism                                                | 2.47  | 2.99  | 2.08  |
| b2870     | <i>ygeW</i> | putative carbamoyl transferase                                                                      | Energy metabolism                                                | -1.71 | 2.73  | 1.76  |
| b0733     | <i>cydA</i> | cytochrome d terminal oxidase, polypeptide<br>subunit I                                             | Energy metabolism                                                | 2.80  | 2.19  | 1.47  |
| b2579     | <i>yfiD</i> | putative formate acetyltransferase                                                                  | Hypothetical proteins                                            | 3.35  | 5.09  | 2.81  |
| b0953     | <i>rmf</i>  | ribosome modulation factor                                                                          | Unknown function                                                 | 1.06  | 3.83  | 2.47  |
| b1823     | <i>cspC</i> | cold shock protein                                                                                  | Unknown function                                                 | 2.04  | 1.29  | -1.18 |
| Cluster 6 |             |                                                                                                     |                                                                  |       |       |       |

|       |             |                                                                                         |                                               |       |       |       |
|-------|-------------|-----------------------------------------------------------------------------------------|-----------------------------------------------|-------|-------|-------|
| b2871 | <i>ygeX</i> | putative dehydratase                                                                    | Amino acid biosynthesis;<br>Energy metabolism | -1.20 | 2.59  | 1.00  |
| b1925 | <i>fliS</i> | flagellar biosynthesis; repressor of class 3a and 3b<br>operons                         | Cellular processes                            | -2.25 | -1.04 | 1.30  |
| b1924 | <i>fliD</i> | flagellar biosynthesis; filament capping protein;<br>enables filament assembly          | Cellular processes                            | -2.20 | -1.05 | -1.25 |
| b1887 | <i>cheW</i> | positive regulator of CheA protein activity                                             | Cellular processes                            | -2.39 | -1.07 | 1.18  |
| b1070 | <i>flgN</i> | protein of flagellar biosynthesis                                                       | Cellular processes                            | -2.25 | -1.08 | -1.38 |
| b1082 | <i>flgK</i> | flagellar biosynthesis, hook-filament junction<br>protein 1                             | Cellular processes                            | -2.33 | -1.11 | -1.13 |
| b1923 | <i>fliC</i> | flagellar biosynthesis; flagellin, filament structural<br>protein                       | Cellular processes                            | -2.53 | -1.11 | -1.04 |
| b1882 | <i>cheY</i> | chemotaxis regulator transmits chemoreceptor<br>signals to flagellar motor components   | Cellular processes                            | -2.01 | -1.23 | -1.05 |
| b1922 | <i>fliA</i> | flagellar biosynthesis; alternative sigma factor 28;<br>regulation of flagellar operons | Cellular processes;<br>Transcription          | -3.11 | -1.05 | -1.04 |
| b1397 | <i>paaJ</i> | putative acyltransferase                                                                | Central intermediary<br>metabolism            | -1.19 | 1.39  | 2.25  |
| b1676 | <i>pykF</i> | pyruvate kinase I                                                                       | Energy metabolism                             | -1.37 | 1.38  | 2.30  |
| b0849 | <i>grxA</i> | glutaredoxin1 redox coenzyme for<br>glutathione-dependent ribonucleotide reductase      | Energy metabolism                             | -3.09 | -1.64 | 1.05  |
| b1789 | <i>yeaL</i> | orf, hypothetical protein                                                               | Hypothetical proteins                         | 1.07  | 1.74  | 2.07  |
| b2151 | <i>galS</i> | mgl repressor, galactose operon inducer                                                 | Regulatory functions                          | -1.12 | 1.83  | 2.22  |
| b1818 | <i>manY</i> | PTS enzyme IIC, mannose-specific                                                        | Transport and binding<br>proteins             | -1.14 | 2.53  | 2.51  |
| b1819 | <i>manZ</i> | PTS enzyme IID, mannose-specific                                                        | Transport and binding<br>proteins             | -1.20 | 2.19  | 2.88  |
| b1817 | <i>manX</i> | PTS enzyme IIAB, mannose-specific                                                       | Transport and binding<br>proteins             | -1.28 | 2.18  | 2.23  |
| b3528 | <i>dctA</i> | uptake of C4-dicarboxylic acids                                                         | Transport and binding<br>proteins             | 1.04  | 1.87  | 2.18  |
| b3751 | <i>rbsB</i> | D-ribose periplasmic binding protein                                                    | Transport and binding<br>proteins             | -1.06 | 1.83  | 2.47  |
| b2215 | <i>ompC</i> | outer membrane protein 1b                                                               | Transport and binding<br>proteins             | 1.30  | 1.81  | 2.62  |
| b3748 | <i>rbsD</i> | D-ribose high-affinity transport system;<br>membrane-associated protein                 | Transport and binding<br>proteins             | -1.69 | 1.47  | 2.61  |
| b2150 | <i>mglB</i> | galactose-binding transport protein; receptor for<br>galactose taxis                    | Transport and binding<br>proteins             | -1.36 | 1.43  | 3.75  |
| b2149 | <i>mglA</i> | ATP-binding component of methyl-galactoside<br>transport and galactose taxis            | Unclassified                                  | -1.18 | 1.71  | 2.23  |
| b3914 |             | orf, hypothetical protein                                                               | Unclassified                                  | 1.44  | 1.69  | 2.21  |
| b1921 | <i>fliZ</i> | orf, hypothetical protein                                                               | Unclassified                                  | -2.04 | 1.10  | 1.16  |

|       |             |                           |                  |       |      |      |
|-------|-------------|---------------------------|------------------|-------|------|------|
| b2872 | <i>ygeY</i> | putative deacetylase      | Unclassified     | -1.86 | 2.83 | 2.65 |
| b0735 | <i>ybgE</i> | orf, hypothetical protein | Unknown function | 2.04  | 2.83 | 3.05 |
